# Supplementary material for: Syntheses and post-functionalization of tri-substituted polyalkoxohexavanadates containing tris(alkoxo) ligands
Source: Royal Society of Chemistry journal article supplement (doi:10.1039/c7dt01543g), 2017-01-01
Supplement: c7dt01543g1.pdf [file c7dt01543g1.pdf]

## Supporting Information

### Syntheses and post-functionalization of tri-substituted polyalkoxo hexavanadates containing tris(alkoxo) ligands

Xunliang Hu,<sup>a</sup> Zicheng Xiao,<sup>\*a</sup> Bo Huang<sup>a</sup>, Xiaokang Hu,<sup>a</sup> Min Cheng,<sup>a</sup> Xinjun Lin,<sup>a</sup> Pingfan Wu,<sup>\*a</sup>  
Yongge Wei<sup>\*a,b</sup>

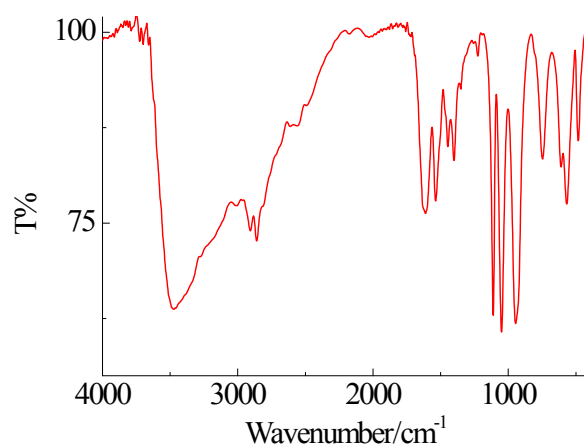

**Figure S1.** FT-IR spectrum measured for the solid sample of **1**.

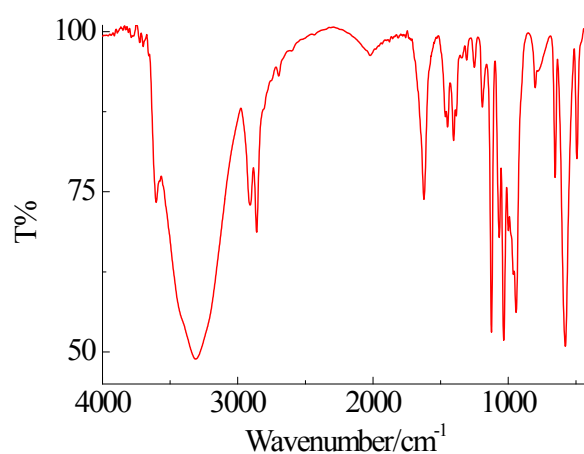

**Figure S2.** FT-IR spectrum measured for the solid sample of **2**.

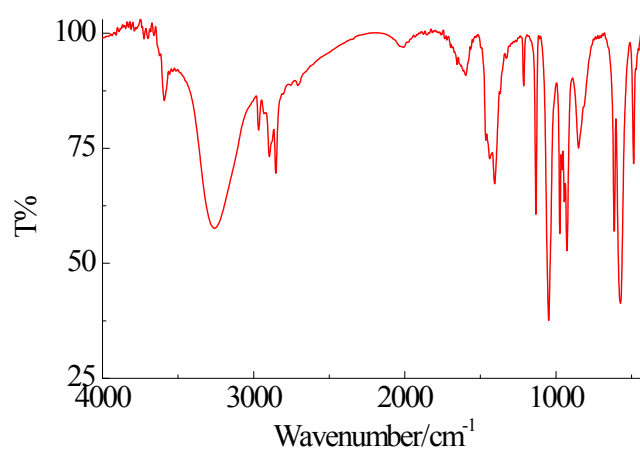

**Figure S3.** FT-IR spectrum measured for the solid sample of **3**.

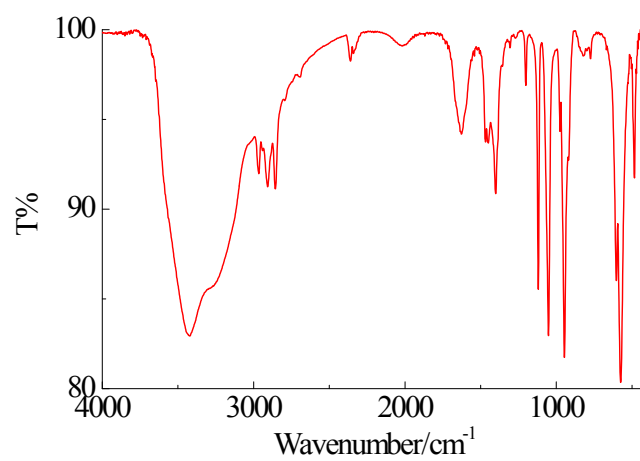

**Figure S4.** FT-IR spectrum measured for the solid sample of **4**.

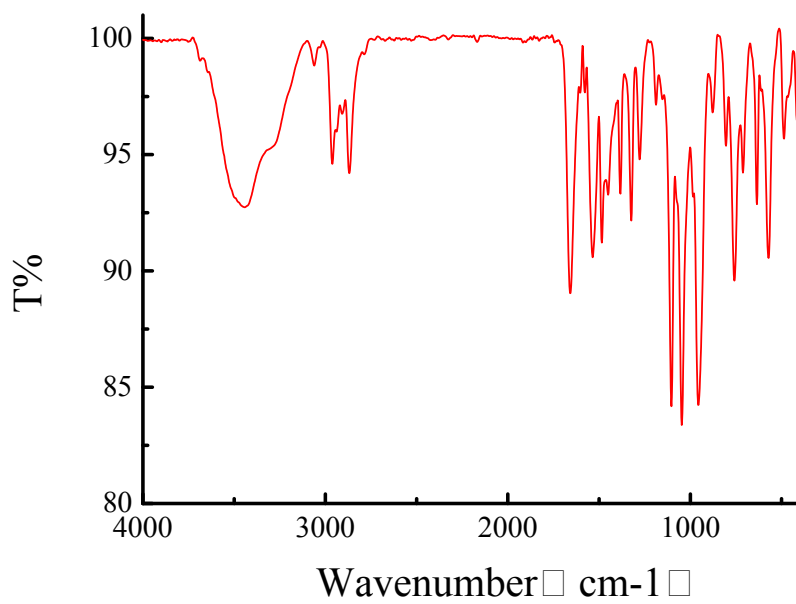

**Figure S5.** FT-IR spectrum measured for the solid sample of **5**.

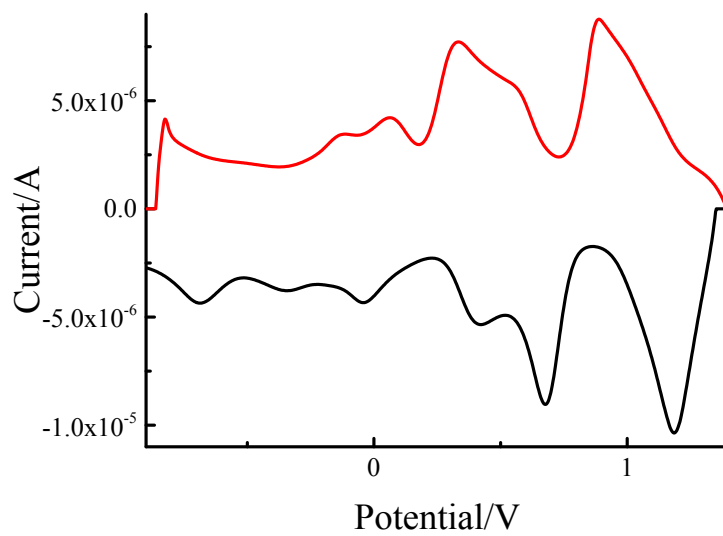

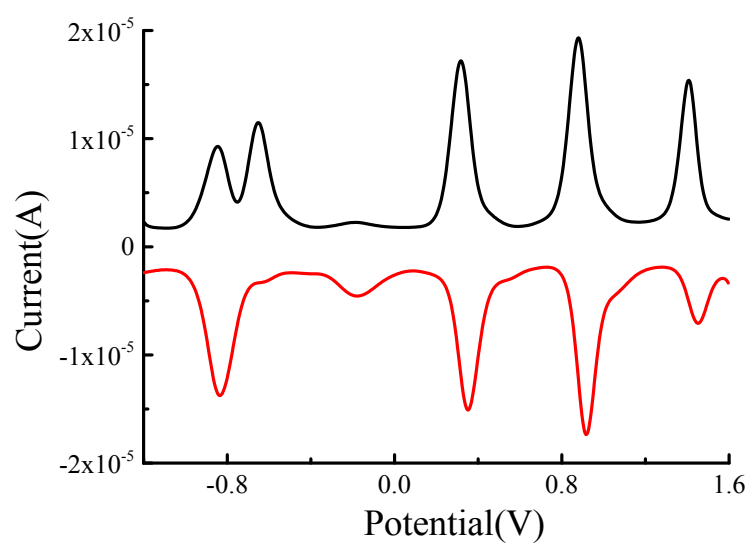

**Figure S6.** Differential Pulse Voltammetry spectra of **1** and **5**.

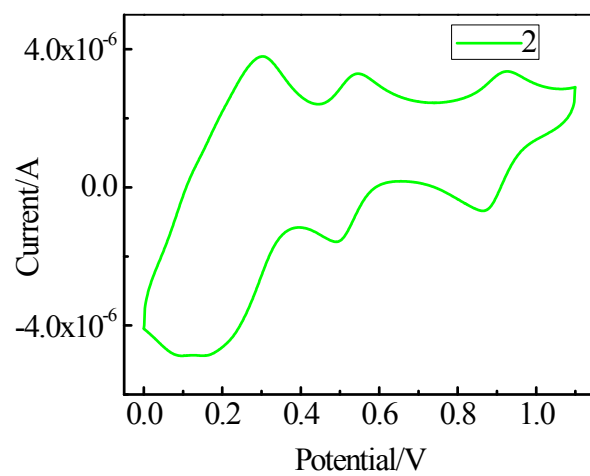

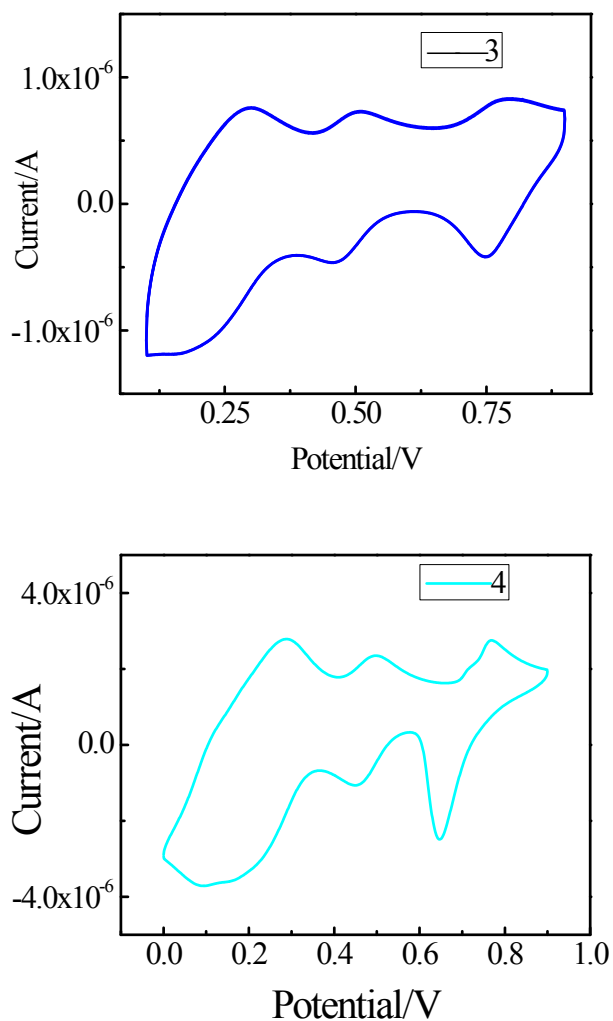

**Figure S7.** Cyclic voltammogram spectrum of **2,3,4**.

**Table S1** Summary of BVS calculations for the vanadium atoms in **1 - 5**

|             |             |             |             |                                     |
|-------------|-------------|-------------|-------------|-------------------------------------|
| 1           | 2           | 3           | 4           | 5                                   |
| V1<br>4.921 | V1<br>4.025 | V1<br>4.022 | V1 4.03     | V1 3.990<br>4.038                   |
| V2<br>4.110 | V2<br>4.091 | V2<br>4.036 | V2<br>4.056 | V2 4.044<br>4.048                   |
|             | V3<br>4.044 |             | V3<br>4.009 | V3 4.141<br>4.055                   |
|             | V4<br>3.977 |             | V4 4.01     | V4 4.988<br>4.931                   |
|             |             |             | V5<br>4.026 | V5 5.002<br>5.082                   |
|             |             |             | V6<br>4.051 | V6 4.981<br>4.973                   |
|             |             |             |             | V7<br>V8<br>V9<br>V10<br>V11<br>V12 |

**Table S2** Binding Energies (eV) for Compounds **1-5**

|           | <b>1 (0.66)</b> |       | <b>2</b> | <b>3</b> | <b>4</b> | <b>5</b> |        |
|-----------|-----------------|-------|----------|----------|----------|----------|--------|
| FWHE(eV)  | 1.85            | 2.10  | 1.96     | 2.20     | 2.14     | 1.79     | 2.05   |
| 2p3/2(eV) | 515.85          | 517.1 | 515.76   | 515.7    | 515.9    | 515.75   | 516.95 |
| FWHE(eV)  | 2.14            | 2.10  | 2.20     | 2.20     | 2.51     | 2.1      | 2.1    |
| 2p1/2(eV) | 523.05          | 524.3 | 522.91   | 522.875  | 523      | 523.2    | 524.15 |

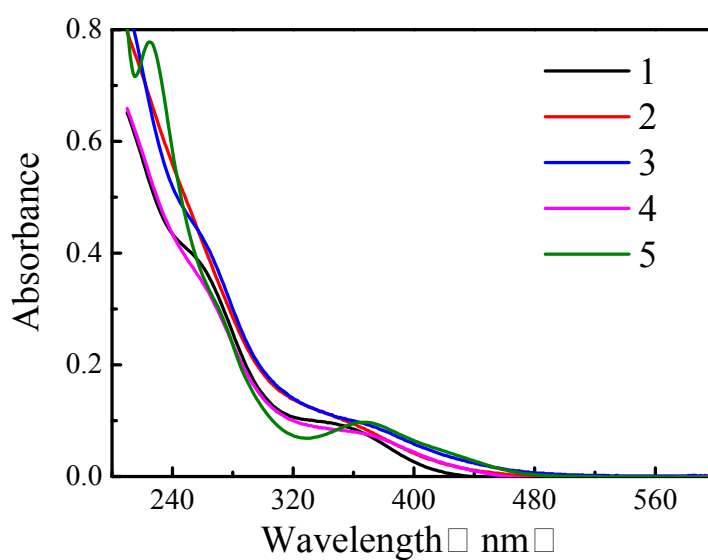

**Fig. S8** UV-vis spectra in water solution (**1-4**) and in acetonitrile (**5**).

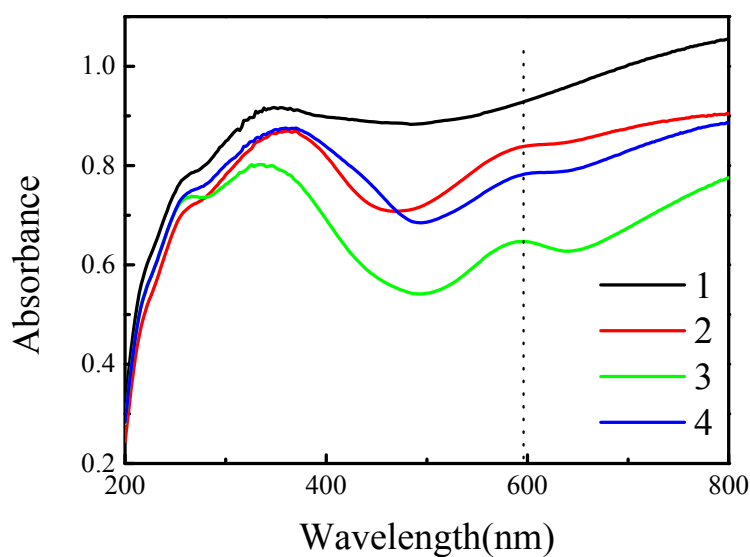

**Fig. S9** UV-vis DRS spectra of compounds **1-4**.

**Table S3** Details of crystal data and structure refinement for **1-5**.

| Identification code              | 1                                                                        | 2                                                              | 3                                                             | 4                                                             | 5                                                                    |
|----------------------------------|--------------------------------------------------------------------------|----------------------------------------------------------------|---------------------------------------------------------------|---------------------------------------------------------------|----------------------------------------------------------------------|
| Empirical formula                | $\text{Na}_2\text{V}_6\text{N}_3\text{O}_{28}\text{C}_{12}\text{H}_{42}$ | $\text{Na}_2\text{V}_6\text{O}_{31}\text{C}_{13}\text{H}_{48}$ | $\text{C}_{15}\text{H}_{30}\text{N}_3\text{O}_{19}\text{V}_6$ | $\text{C}_{18}\text{H}_{52}\text{N}_2\text{O}_{23}\text{V}_6$ | $\text{C}_{114}\text{H}_{180}\text{N}_9\text{NaO}_{44}\text{V}_{12}$ |
| Formula weight                   | 1028.09                                                                  | 1076.14                                                        | 862.06                                                        | 970.25416                                                     | 3014.93                                                              |
| Temperature/K                    | 293(2)                                                                   | 121.7                                                          | 105(2)                                                        | 105.6                                                         | 106.6                                                                |
| Crystal system                   | cubic                                                                    | orthorhombic                                                   | hexagonal                                                     | monoclinic                                                    | triclinic                                                            |
| Space group                      | <i>I</i> 23                                                              | <i>Pnmm</i>                                                    | <i>P63mc</i>                                                  | <i>P21/c</i>                                                  | <i>P-1</i>                                                           |
| a/Å                              | 19.168(2)                                                                | 10.2542(8)                                                     | 12.9234(4)                                                    | 9.9874(3)                                                     | 17.3307(7)                                                           |
| b/Å                              | 19.168(2)                                                                | 27.096(2)                                                      | 12.9234(4)                                                    | 26.3528(10)                                                   | 17.3855(8)                                                           |
| c/Å                              | 19.168(2)                                                                | 12.9530(10)                                                    | 9.8515(3)                                                     | 16.3613(4)                                                    | 32.3235(12)                                                          |
| $\alpha / ^\circ$                | 90                                                                       | 90                                                             | 90                                                            | 90                                                            | 90.823(3)                                                            |
| $\beta / ^\circ$                 | 90                                                                       | 90                                                             | 90                                                            | 127.6200(10)                                                  | 100.203(4)                                                           |
| $\gamma / ^\circ$                | 90                                                                       | 90                                                             | 120                                                           | 90                                                            | 119.450(5)                                                           |
| Volume/Å <sup>3</sup>            | 7042(2)                                                                  | 3599.0(5)                                                      | 1424.91(11)                                                   | 3410.86(18)                                                   | 8287.9(7)                                                            |
| Z                                | 8                                                                        | 4                                                              | 2                                                             | 4                                                             | 2                                                                    |
| $\rho_{\text{calc}}/\text{cm}^3$ | 1.724                                                                    | 1.955                                                          | 2.009                                                         | 1.86                                                          | 1.208                                                                |
| $\mu/\text{mm}^{-1}$             | 1.631                                                                    | 1.627                                                          | 1.975                                                         | 1.67                                                          | 0.713                                                                |
| F(000)                           | 3624.0                                                                   | 2108                                                           | 862                                                           | 1916                                                          | 3132                                                                 |
| Crystal size/mm <sup>3</sup>     | 0.30 × 0.25 × 0.25                                                       | 0.30 × 0.25 × 0.02                                             | 0.20 × 0.12 × 0.05                                            | 0.20 × 0.20 × 0.17                                            | 0.140 × 0.130 × 0.050                                                |
| Radiation MoK $\alpha$           | ( $\lambda = 0.71073$ )                                                  | ( $\lambda = 0.7107$ )                                         | ( $\lambda = 0.71073$ )                                       | ( $\lambda = 0.7107$ )                                        | ( $\lambda = 0.71073$ )                                              |

|                                                  |                                                                              |                                                                             |                                                                             |                                                                              |                                                                              |
|--------------------------------------------------|------------------------------------------------------------------------------|-----------------------------------------------------------------------------|-----------------------------------------------------------------------------|------------------------------------------------------------------------------|------------------------------------------------------------------------------|
| 2 $\theta$ range for data collection/ $^{\circ}$ | 3.004 to 52.544                                                              | 5.9 to 52                                                                   | 6.3 to 52                                                                   | 6 to 51.98                                                                   | 6.272 to 52                                                                  |
| Index ranges                                     | -23 $\leq$ h $\leq$ 23,<br>-23 $\leq$ k $\leq$ 23,<br>-23 $\leq$ l $\leq$ 23 | -8 $\leq$ h $\leq$ 12,<br>-22 $\leq$ k $\leq$ 33,<br>-14 $\leq$ l $\leq$ 15 | -9 $\leq$ h $\leq$ 15,<br>-15 $\leq$ k $\leq$ 15,<br>-12 $\leq$ l $\leq$ 12 | -12 $\leq$ h $\leq$ 12,<br>-32 $\leq$ k $\leq$ 32,<br>-20 $\leq$ l $\leq$ 20 | -21 $\leq$ h $\leq$ 21,<br>-18 $\leq$ k $\leq$ 21,<br>-39 $\leq$ l $\leq$ 39 |
| Reflections collected                            | 27422                                                                        | 13506                                                                       | 6521                                                                        | 33983                                                                        | 76443                                                                        |
| Independent reflections                          | 2403 [R <sub>int</sub> = 0.1000, R <sub>sigma</sub> = 0.0442]                | 3697 [R <sub>int</sub> = 0.0892, R <sub>sigma</sub> = 0.0907]               | 1064 [R <sub>int</sub> = 0.0426, R <sub>sigma</sub> = 0.0276]               | 6697 [R <sub>int</sub> = 0.0420, R <sub>sigma</sub> = 0.0312]                | 32532 [R <sub>int</sub> = 0.0891, R <sub>sigma</sub> = 0.1677]               |
| Data/restraints/parameters                       | 2403/2/136                                                                   | 3697/0/294                                                                  | 1064/1/83                                                                   | 6697/0/446                                                                   | 32532/71/1676                                                                |
| Goodness-of-fit on F <sup>2</sup>                | 1.075                                                                        | 1.082                                                                       | 1.083                                                                       | 1.051                                                                        | 0.910                                                                        |
| Final R indexes [I > 2 $\sigma$ (I)]             | R <sub>1</sub> = 0.0386, wR <sub>2</sub> = 0.0967                            | R <sub>1</sub> = 0.0895, wR <sub>2</sub> = 0.2013                           | R <sub>1</sub> = 0.0268, wR <sub>2</sub> = 0.0724                           | R <sub>1</sub> = 0.0353, wR <sub>2</sub> = 0.0895                            | R <sub>1</sub> = 0.0735, wR <sub>2</sub> = 0.1682                            |
| Final R indexes [all data]                       | R <sub>1</sub> = 0.0549, wR <sub>2</sub> = 0.1061                            | R <sub>1</sub> = 0.1208, wR <sub>2</sub> = 0.2191                           | R <sub>1</sub> = 0.0284, wR <sub>2</sub> = 0.0734                           | R <sub>1</sub> = 0.0387, wR <sub>2</sub> = 0.0918                            | R <sub>1</sub> = 0.1375, wR <sub>2</sub> = 0.1935                            |
| Largest diff. peak/hole / e $\text{\AA}^{-3}$    | 0.46/-0.32                                                                   | 1.42/-1.19                                                                  | 0.61/-0.30                                                                  | 0.70/-0.56                                                                   | 1.46/-0.49                                                                   |

1#395-460 RT: 0.92-1.07 AV: 66 SB: 67 0.27-0.34, 0.27-0.34 NL: 6.22E7  
T: FTMS - p ESI/Full.ms [133.40-2000.00]

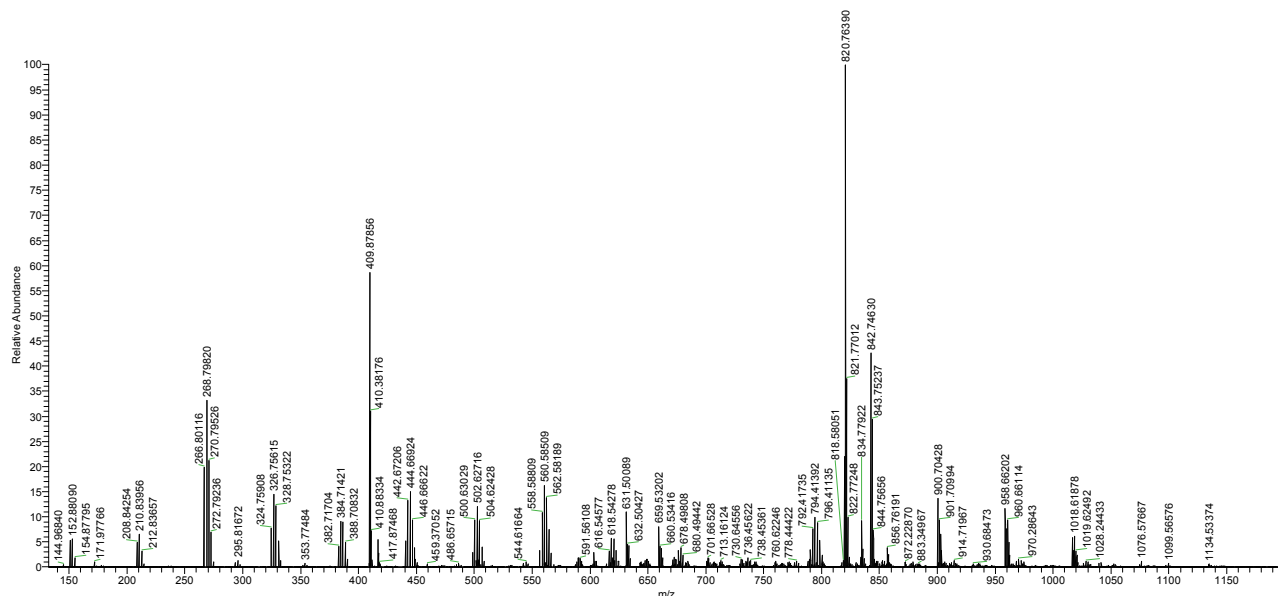

Fig. S10 ESI mass spectrum of compound 1.



5 #403-582 RT: 0.94-1.35 AV: 180 SB: 68 0.20-0.28 , 0.20-0.27 NL: 5.65E8  
T: FTMS - p ESI Full ms [133.40-2000.00]

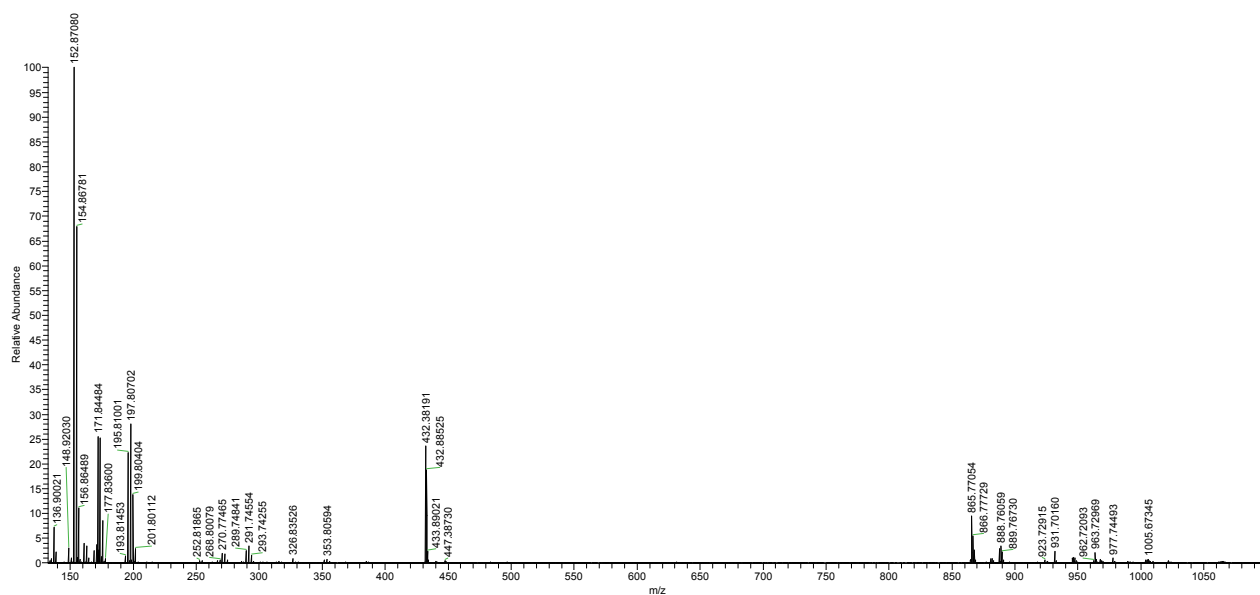

Fig. S11 ESI mass spectrum of compound 2.

3 #657-724 RT: 1.53-1.68 AV: 68 SB: 148 0.22-0.39 , 0.22-0.39 NL: 4.48E7  
T: FTMS - p ESI Full ms [133.40-2000.00]

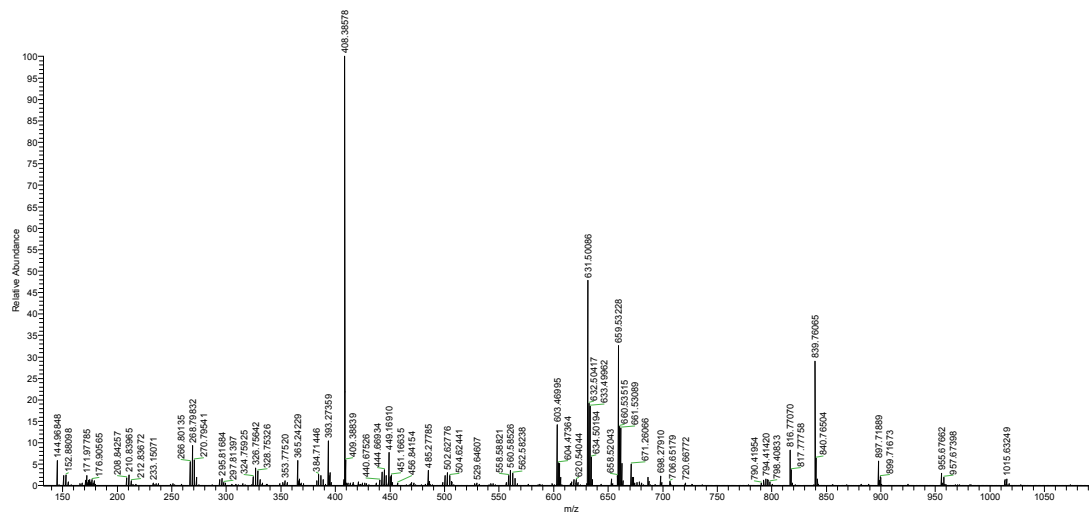

Fig. S12 ESI mass spectrum of compound 3.

4 #581-656 RT: 1.35-1.53 AV: 76 SB: 126 0.23-0.38, 0.23-0.37 NL: 1.86E8  
T: FTMS - p ESI Full ms [133.40-2000.00]

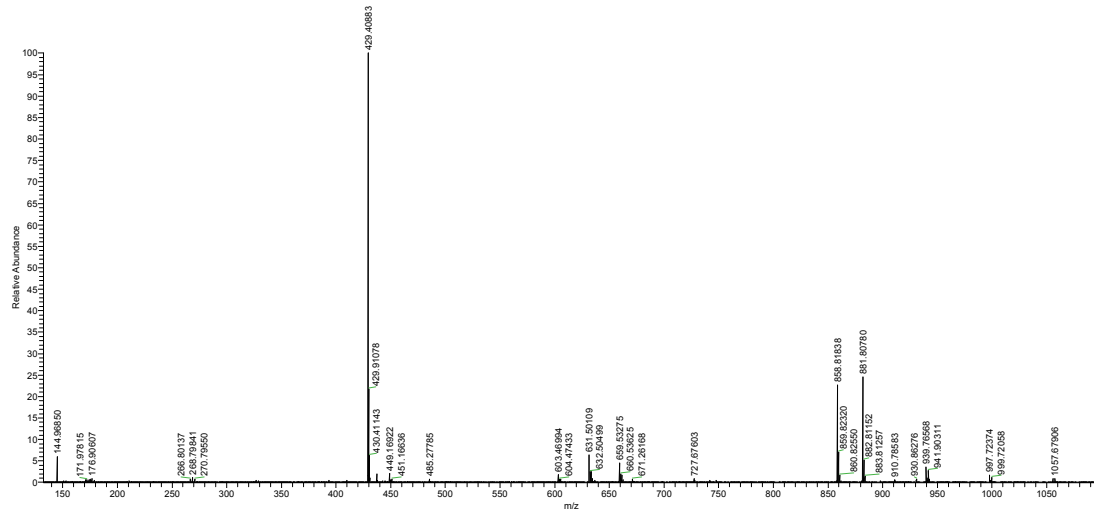

Fig. S13 ESI mass spectrum of compound 4.

1 #434-480 RT: 1.01-1.12 AV: 47 SB: 72 0.21-0.29, 0.20-0.28 NL: 1.86E8  
T: FTMS - p ESI Full ms [133.40-2000.00]

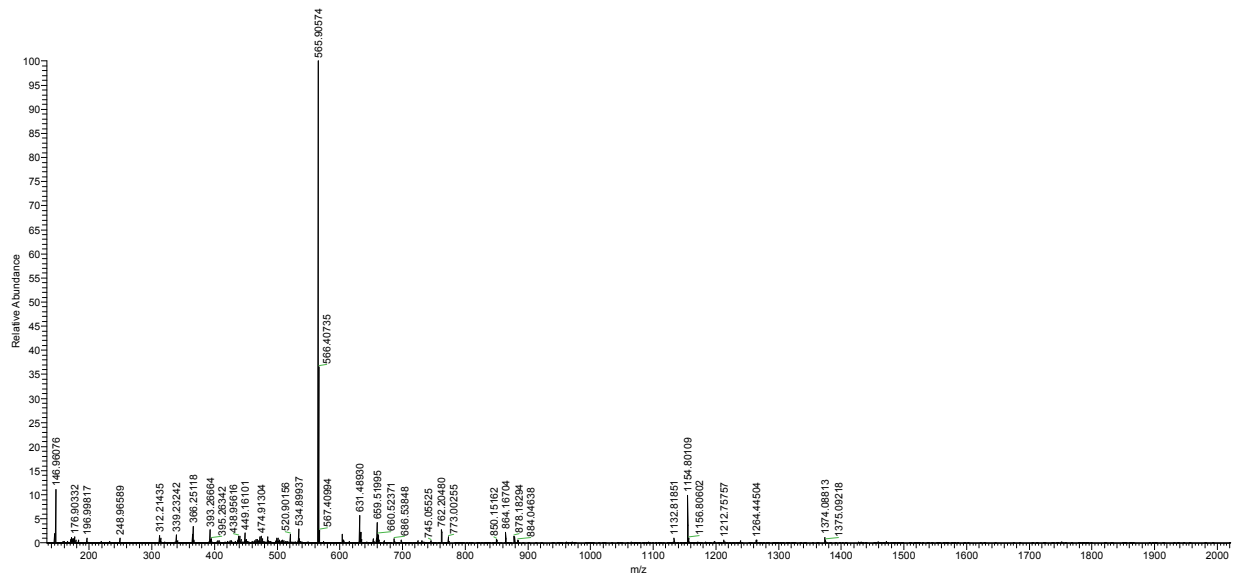

Fig. S14 ESI mass spectrum of compound 5.

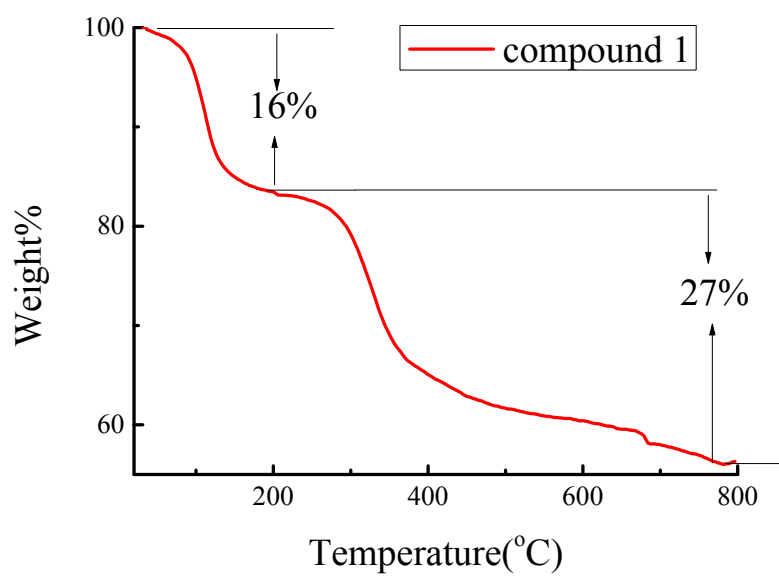

**Fig. S15** TGA curve of compound 1.

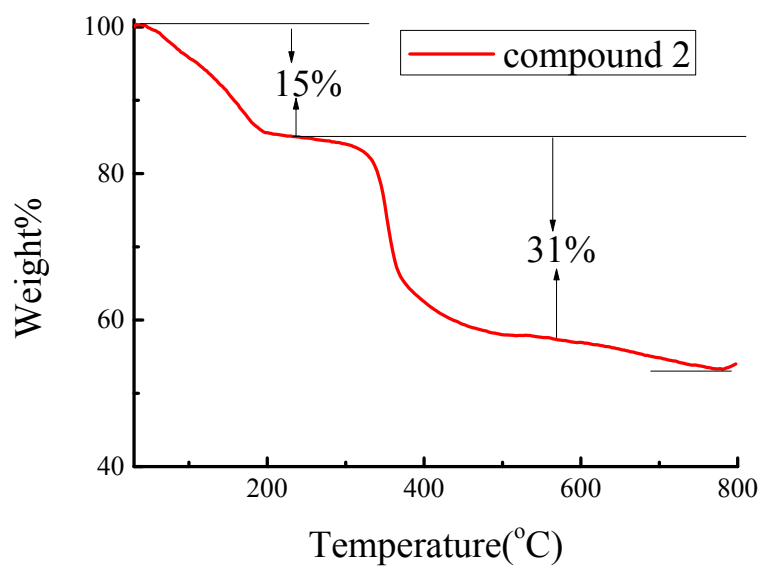

**Fig. S16** TGA curve of compound 2.

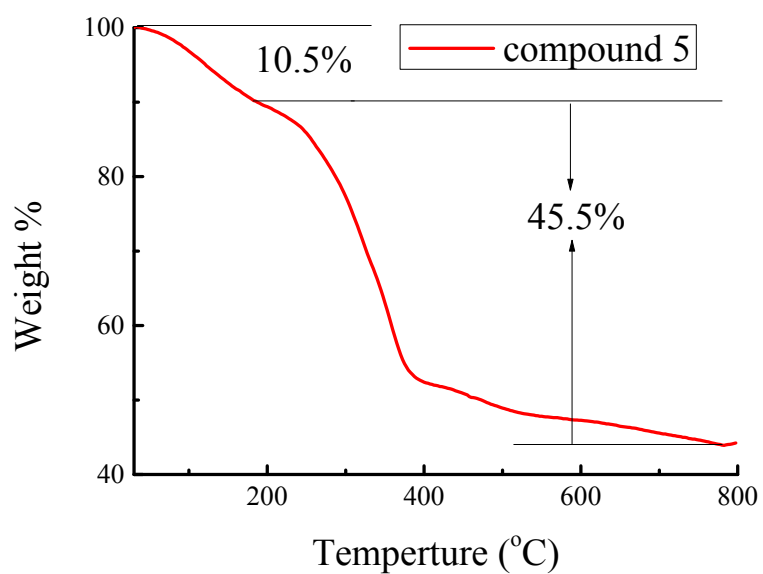

Fig. S17 TGA curve of compound 5.

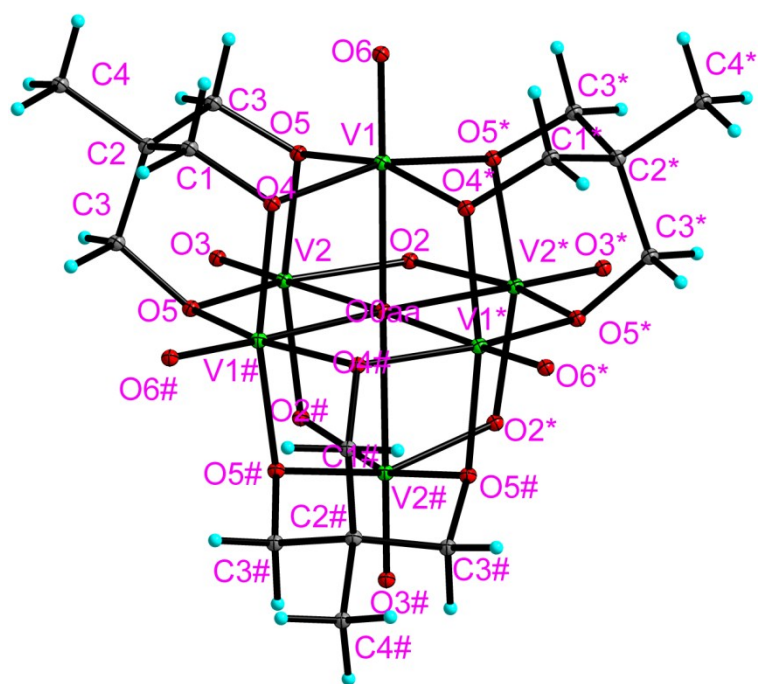

Fig. S18 ORTEP drawing of the cluster anions of 1

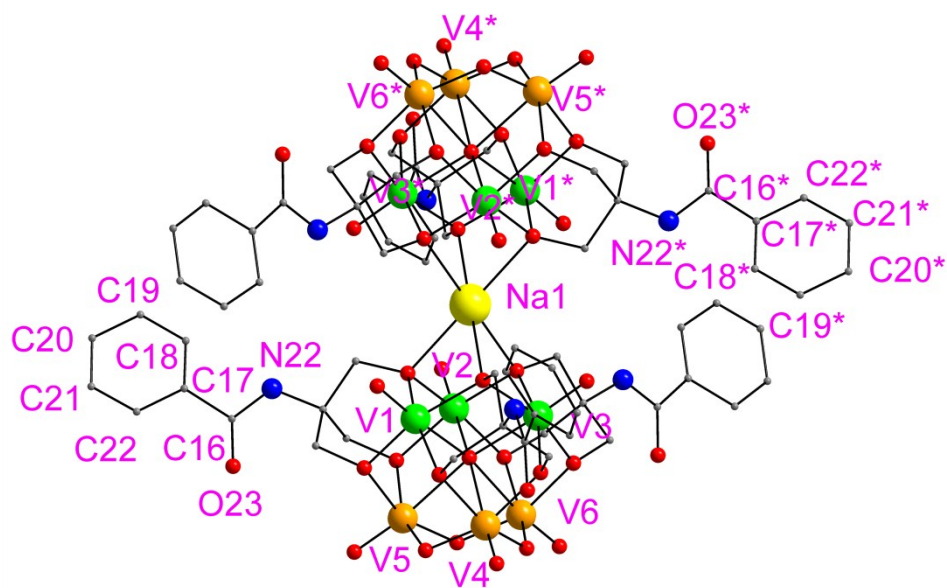

Fig.S19 Center symmetrical structure through sodium ions of **5**.

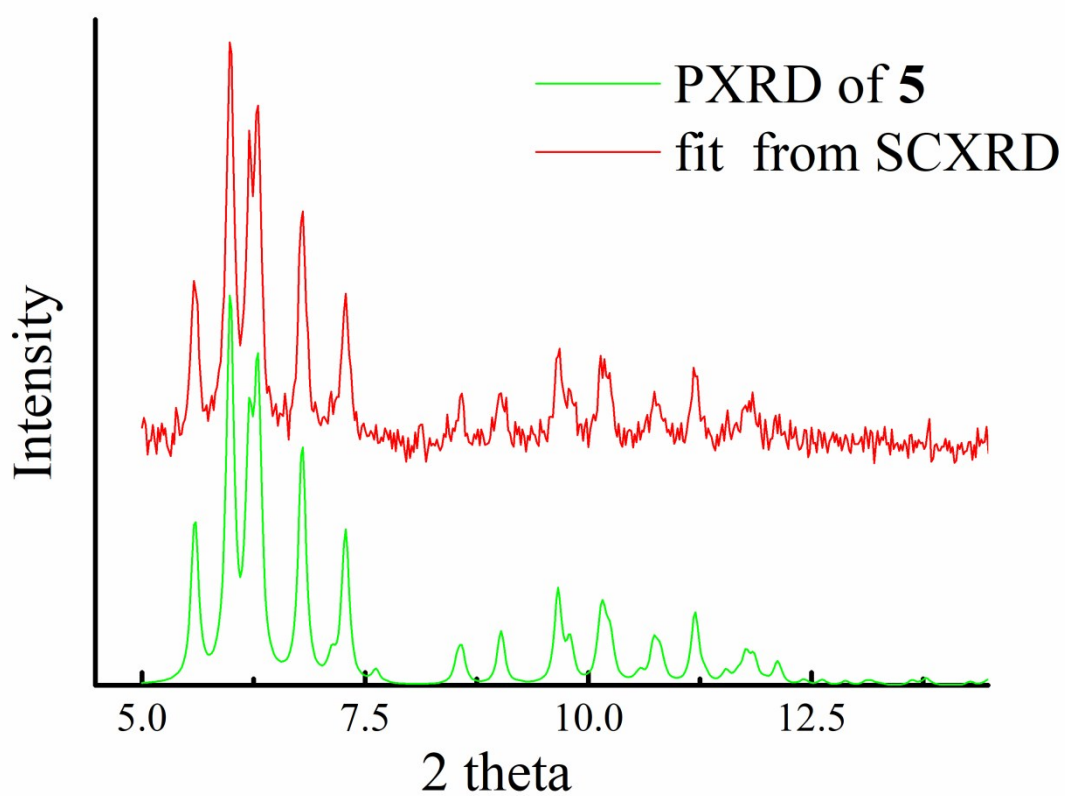

Fig.S20 PXR and SCXRD analysis of **5**.
